# Supplementary material for: Hybrid polymer–metal oxide solar cells by in situ chemical polymerization
Source: Royal Society of Chemistry journal article supplement (doi:10.1039/b902271f), 2009-01-01
Supplement: b902271f.pdf [file b902271f.pdf]

# Hybrid polymer – metal oxide solar cells by chemical *in situ* polymerization

Pedro Atienzar<sup>a</sup>, Thilini Ishwara<sup>a</sup>, Masaki Horie<sup>c</sup>, James R. Durrant<sup>b</sup> and Jenny Nelson<sup>a</sup>

<sup>a</sup> Department of Physics, Imperial College London, London SW7 2AZ, U.K.

<sup>b</sup> Department of Chemistry, Imperial College London, London SW7 2AZ, U.K.

<sup>c</sup> School of Chemistry, OMIC, University of Manchester, Manchester, M13 9PL, U.K.

## Supporting Information

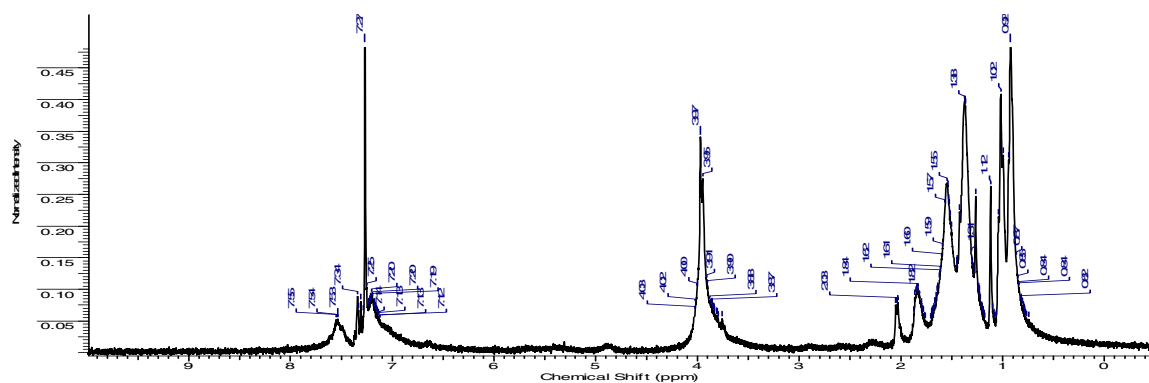

Figure S1: <sup>1</sup>H NMR spectrum of ex-situ MeH-PPV.

Table S1. Molecular weight of MEH-PPV determined by GPC.

| Polymer        | Mn    | Mw     | PDI  |
|----------------|-------|--------|------|
| <i>Ex-situ</i> | 62300 | 336400 | 5.40 |
| <i>Aldrich</i> | 59300 | 240300 | 4.05 |
